# Supplementary material for: Modeling the effects of pollutant emissions from large industrial complexes on benzene, toluene, and xylene concentrations in urban areas
Source: PubMed Central journal article supplement — Environ Health Toxicol. 2017 Nov 20;32:e2017022. doi: 10.5620/eht.e2017022 (PMC5825684; doi:10.5620/eht.e2017022), 2017-11-20
Supplement: eht-32-e2017022-suppl1.pdf [file eht-32-e2017022-suppl1.pdf]

**Table S1.** Configuration of the CCTM (CMAQ chemical transport model) modeling<sup>a</sup>

| Configuration options           | Selected modules |
|---------------------------------|------------------|
| Gas-phase chemistry mechanism   | cb05_ae5_aq      |
| Gas-phase chemistry solver      | ebi_cb05         |
| Horizontal/vertical advection   | hyamo/wrf        |
| Horizontal/vertical diffusion   | multiscale/acm2  |
| Aerosol module                  | aero5            |
| Deposition velocity calculation | m3dry            |
| Cloud module                    | cloud_acm_ae5    |

CCTM, Community Multiscale Air Quality Chemical Transport Model.

<sup>a</sup>From Oh I, et al. Meteorological characteristics in the Ulsan metropolitan region: focus on air temperature and winds. J Korean Soc Atmos Environ 2015;31(2): 181-194 (Korean).
